# Supplementary material for: Two-dimensional FeTe2 and predicted Janus FeXS (X: Te and Se) monolayers with intrinsic half-metallic character: tunable electronic and magnetic properties via strain and electric field
Source: Royal Society of Chemistry journal article supplement (doi:10.1039/d1cp03078g), 2021-01-01
Supplement: d1cp03078g1.pdf [file d1cp03078g1.pdf]

## Supplementary information

### Two-dimensional FeTe<sub>2</sub> and predicted Janus FeXS (X: Te and Se) monolayers with intrinsic half-metallic character: Tunable electronic and magnetic properties via strain and electric field

A. Bafekry, M. Faraji, S. Karbasizadeh, I. Abdolhosseini Sarsari, H. R. Jappor, M. Ghergherehchi  
and D. Gogva

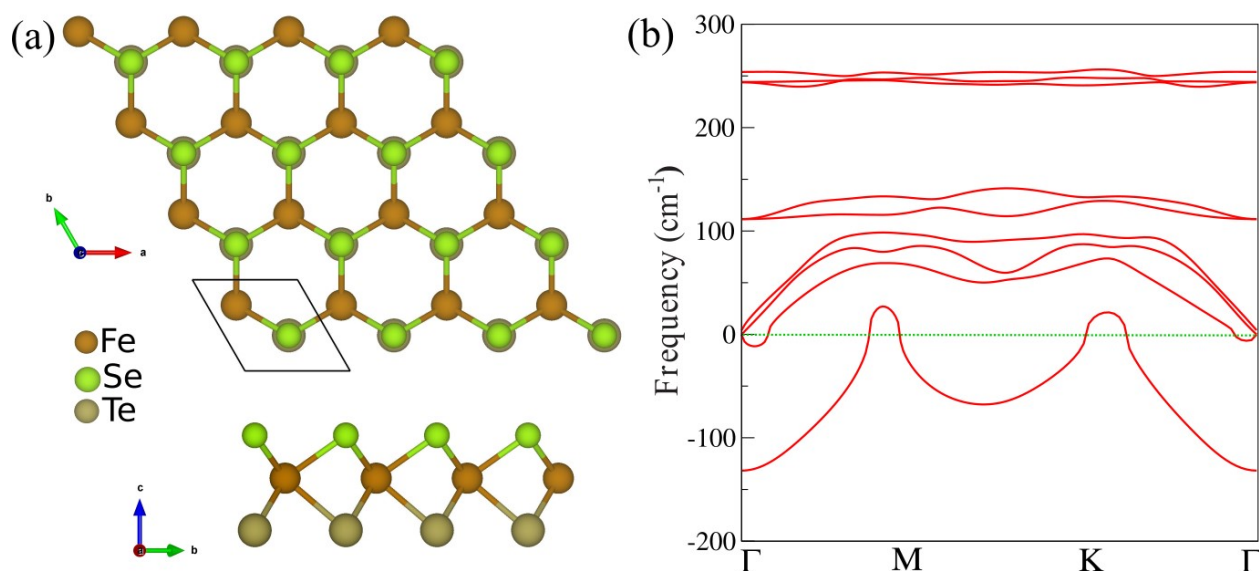

Figure S1: (a) Atomic structure and (b) phonon band of FeTeSe monolayers. The primitive unit cell is indicated by a black parallelogram.

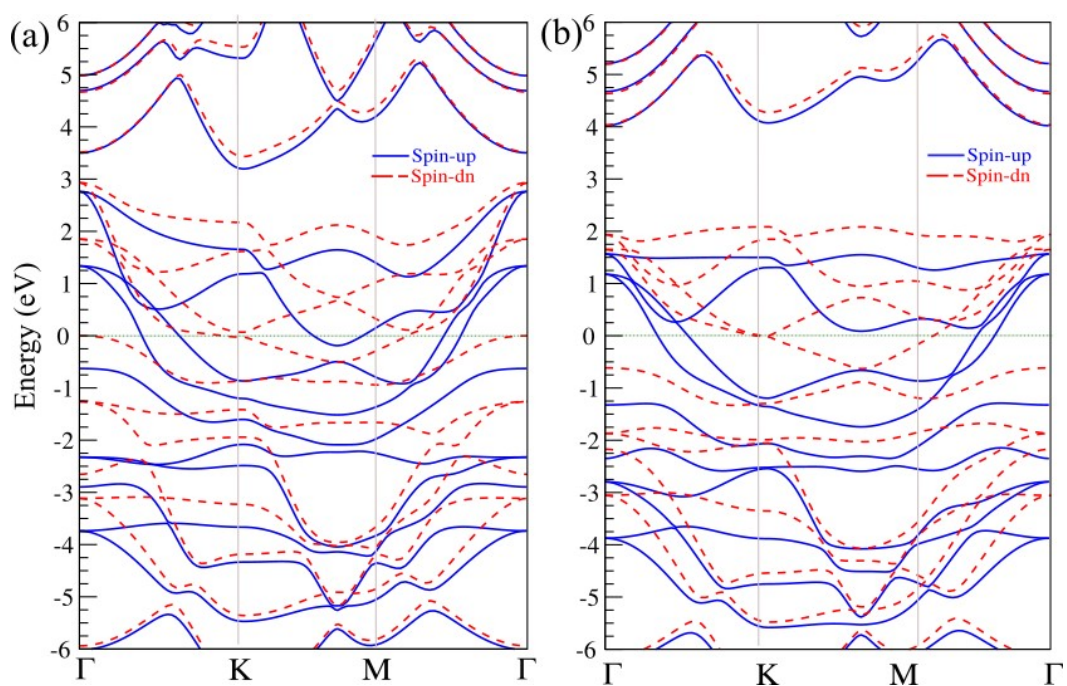

Figure S2: Band structures of (a) FeTeS and (b) FeSeS using the functional of GGA. The zero of energy is at Fermi level.

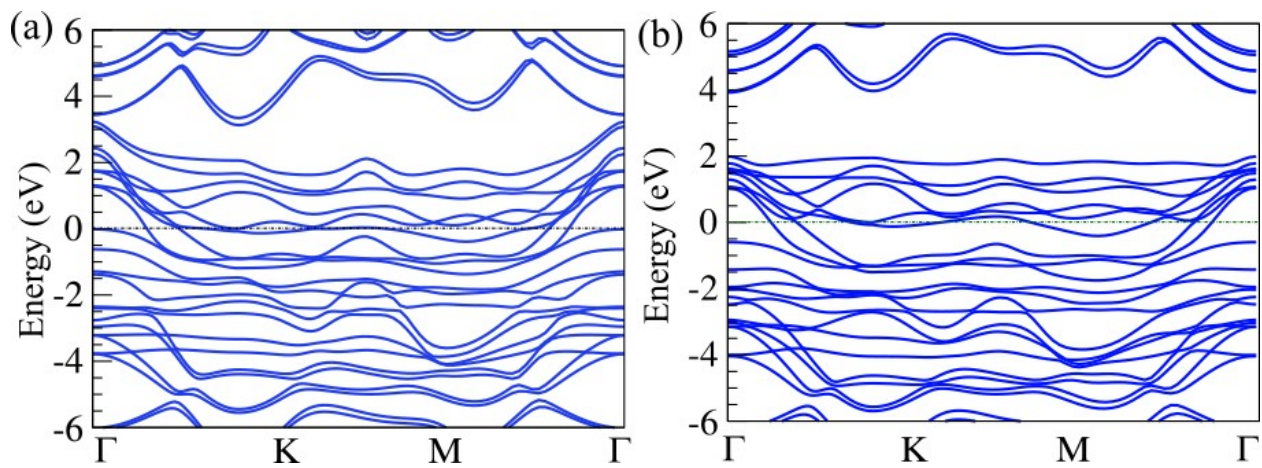

is at Fermi level.

Figure S3: Band structures of (a) FeTeS and (b) FeSeS Janus monolayers. with considering SOC+U. The zero of energy is at Fermi level.

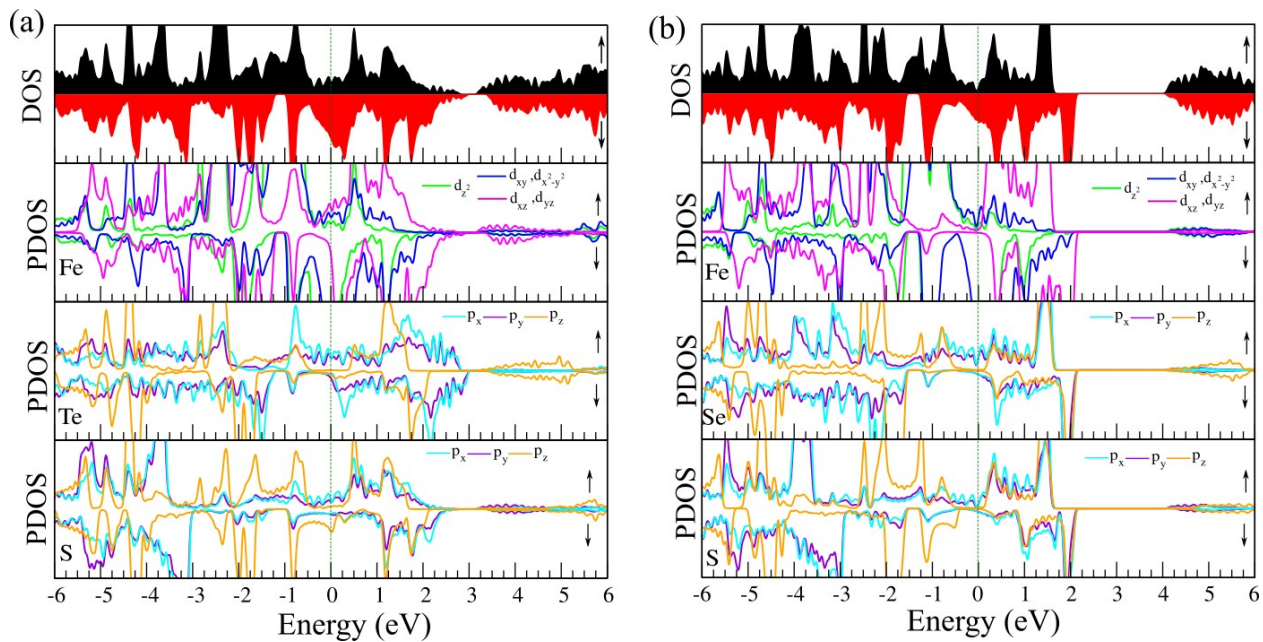

Figure S4: DOS and PDOS of (a) FeTeS and (b) FeSeS Janus monolayers. The contribution from each shell of the effective orbitals are shown separately and the zero of energy is set at Fermi level.

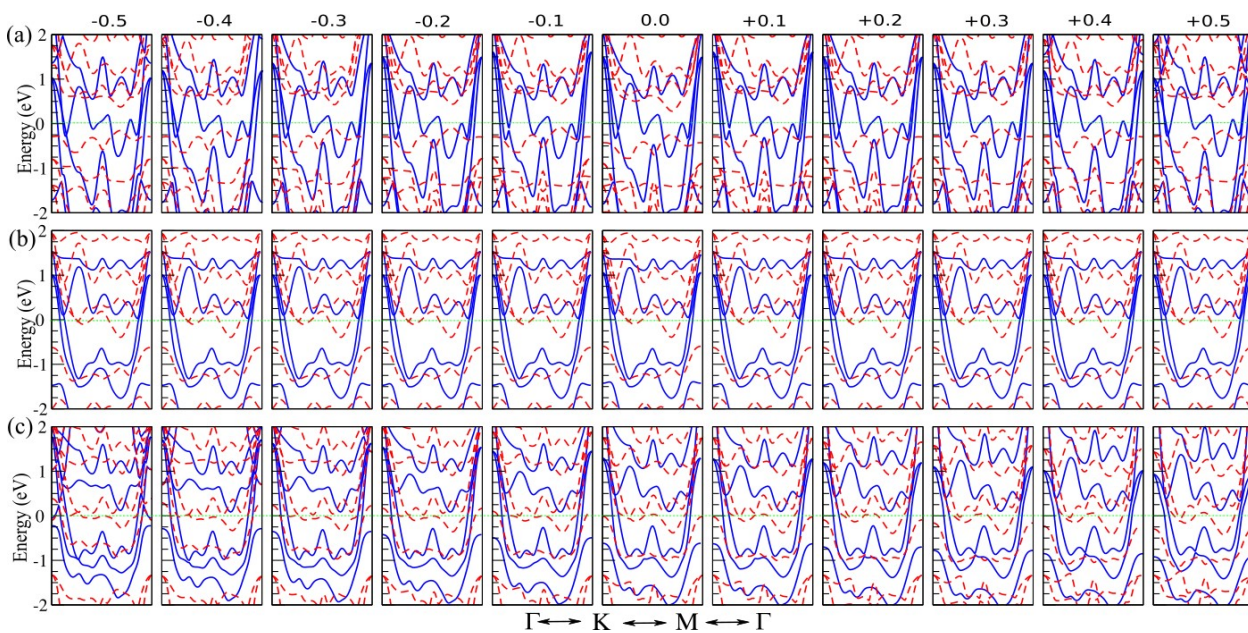

Figure S5: Band structures of (a) FeTe<sub>2</sub>, (b) FeSeS and (c) FeTeS janus monolayers when under the application of electric field.
